# Supplementary material for: Salmonella Biofilm Formation under Fluidic Shear Stress on Different Surface Materials
Source: MDPI journal article supplement (doi:10.3390/foods12091918), 2023-05-08
Supplement: s1 [file s1]

**Table S1.** The OD<sub>600</sub> of each treatment combination before normalization by subtracting the controls.

| Surface         | Incubation   | Strain  | OD <sub>600</sub> |
|-----------------|--------------|---------|-------------------|
| Stainless Steel | Static       | 14028   | 0.081             |
| Stainless Steel | Static       | 4931    | 0.079             |
| Stainless Steel | Static       | SR#0330 | 0.078             |
| Stainless Steel | Static       | SR#0326 | 0.076             |
| Stainless Steel | Static       | K0223   | 0.094             |
| Stainless Steel | Static       | Control | 0.041             |
| Stainless Steel | Shear Stress | 14028   | 0.100             |
| Stainless Steel | Shear Stress | 4931    | 0.086             |
| Stainless Steel | Shear Stress | SR#0330 | 0.122             |
| Stainless Steel | Shear Stress | SR#0326 | 0.113             |
| Stainless Steel | Shear Stress | K0223   | 0.099             |
| Stainless Steel | Shear Stress | Control | 0.025             |
| Rubber          | Static       | 14028   | 0.224             |
| Rubber          | Static       | 4931    | 0.226             |
| Rubber          | Static       | SR#0330 | 0.226             |
| Rubber          | Static       | SR#0326 | 0.253             |
| Rubber          | Static       | K0223   | 0.230             |
| Rubber          | Static       | Control | 0.220             |
| Rubber          | Shear Stress | 14028   | 0.087             |
| Rubber          | Shear Stress | 4931    | 0.120             |
| Rubber          | Shear Stress | SR#0330 | 0.085             |
| Rubber          | Shear Stress | SR#0326 | 0.150             |
| Rubber          | Shear Stress | K0223   | 0.105             |
| Rubber          | Shear Stress | Control | 0.133             |
| Polyethylene    | Static       | 14028   | 0.166             |
| Polyethylene    | Static       | 4931    | 0.186             |
| Polyethylene    | Static       | SR#0330 | 0.244             |
| Polyethylene    | Static       | SR#0326 | 0.232             |
| Polyethylene    | Static       | K0223   | 0.196             |
| Polyethylene    | Static       | Control | 0.027             |
| Polyethylene    | Shear Stress | 14028   | 0.083             |
| Polyethylene    | Shear Stress | 4931    | 0.069             |
| Polyethylene    | Shear Stress | SR#0330 | 0.078             |
| Polyethylene    | Shear Stress | SR#0326 | 0.111             |
| Polyethylene    | Shear Stress | K0223   | 0.198             |
| Polyethylene    | Shear Stress | Control | 0.018             |
